# Supplementary material for: Kinetics of antibody responses dictate COVID-19 outcome
Source: bioRxiv or medRxiv preprint supplement (doi:10.1101/2020.12.18.20248331), 2020-12-22

# Ext. Data Figure1:

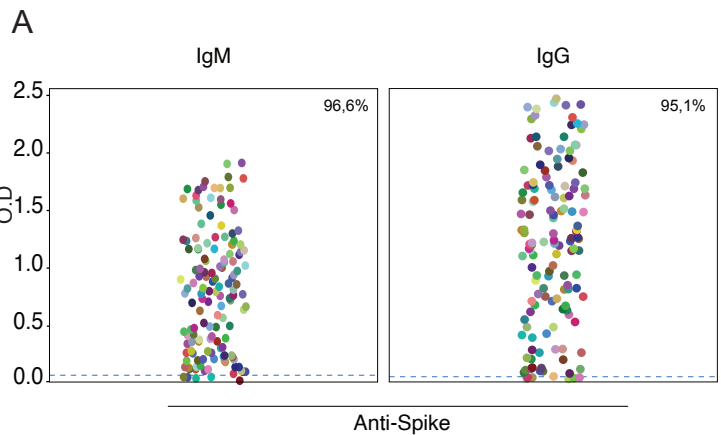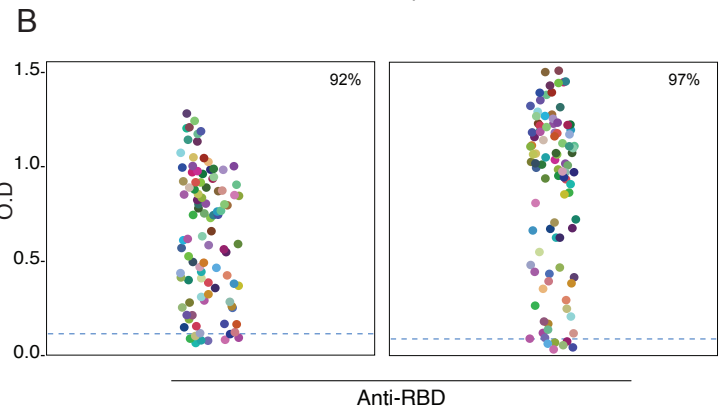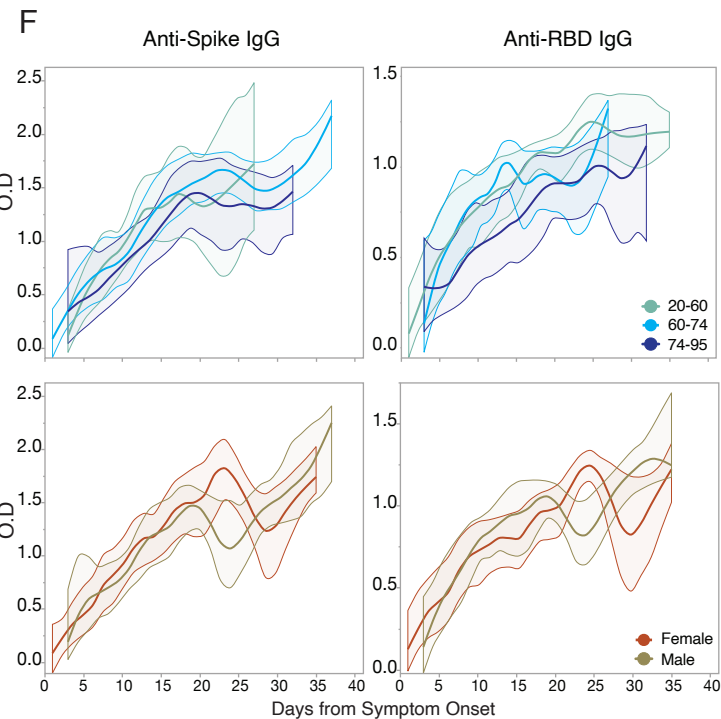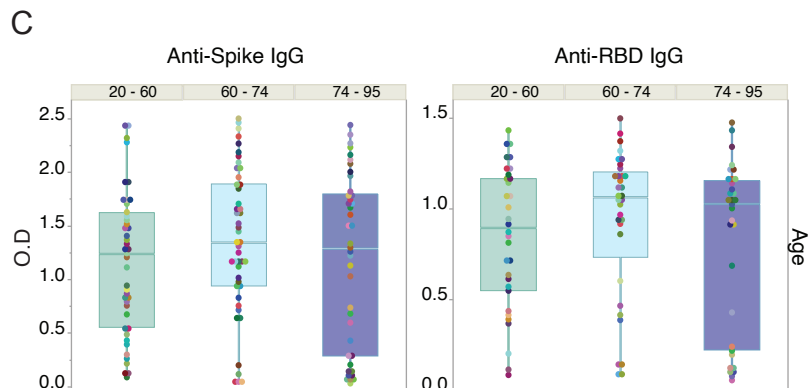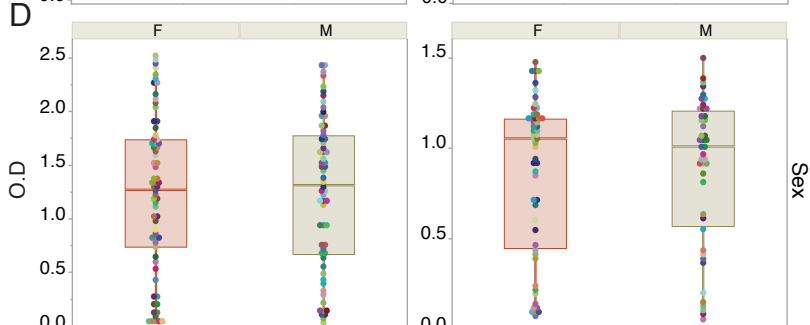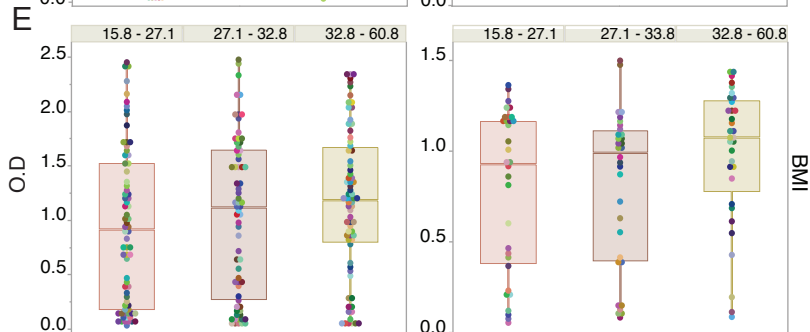

## Ext. Data Figure2:

A

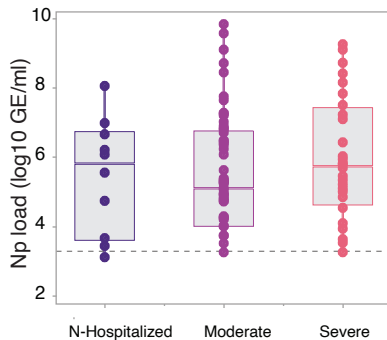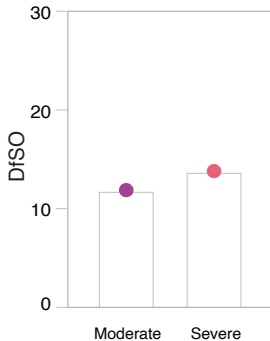

# Ext. Data Figure3:

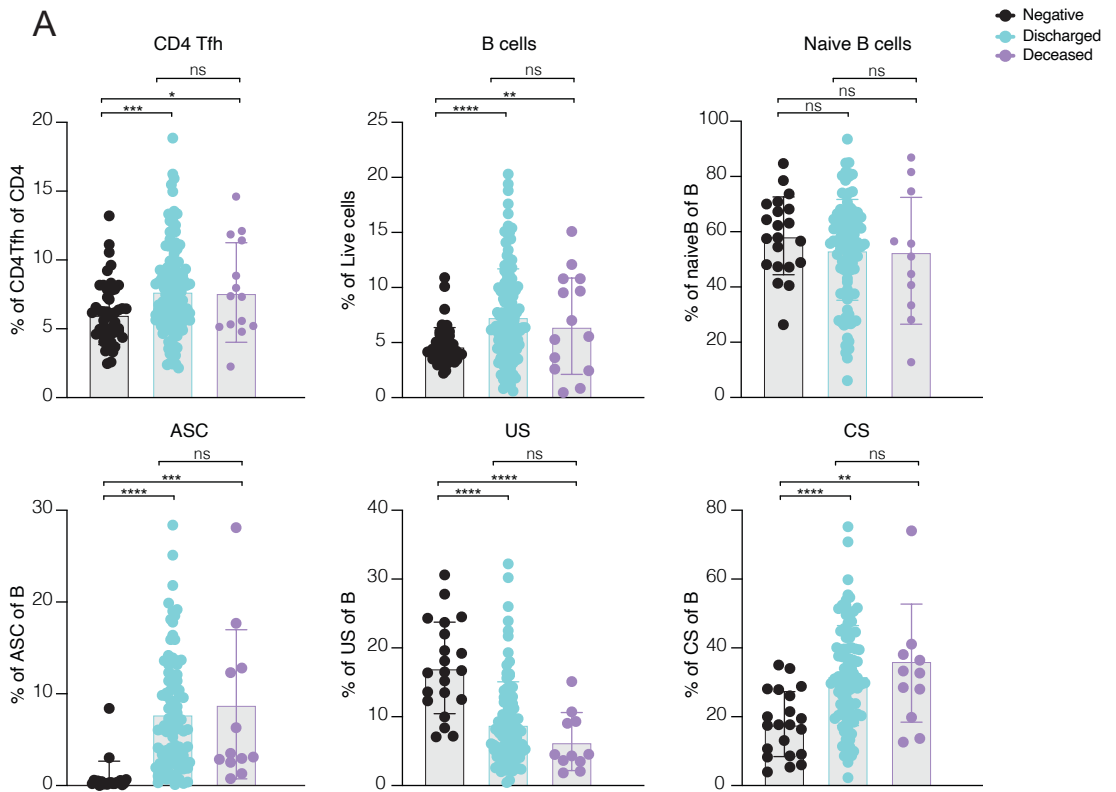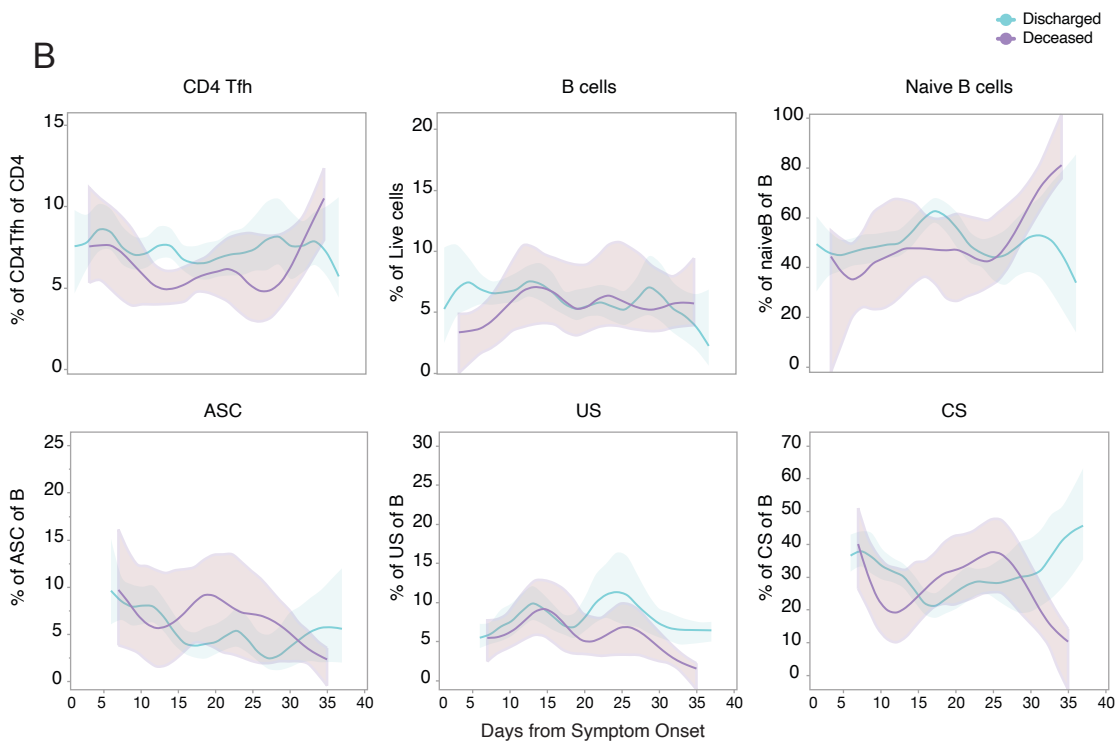

# Ext. Data Fig.4 :

## A

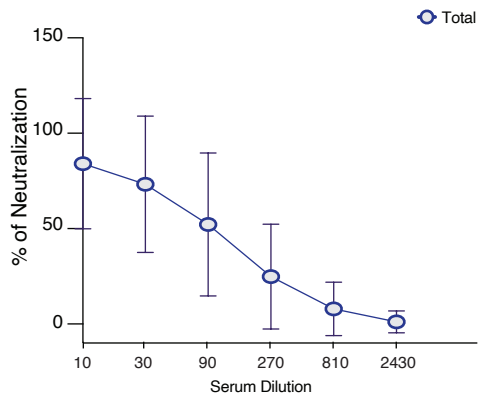

## B

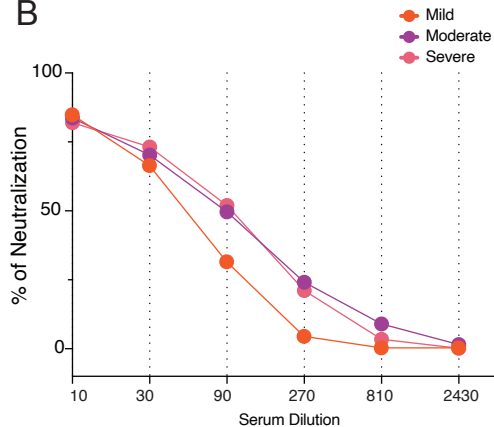

## C

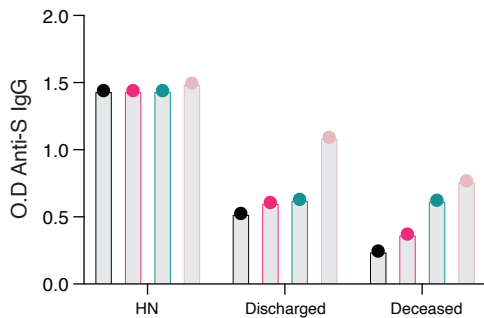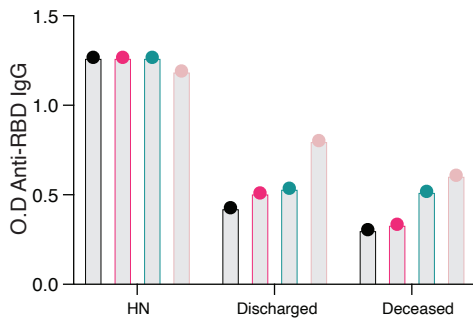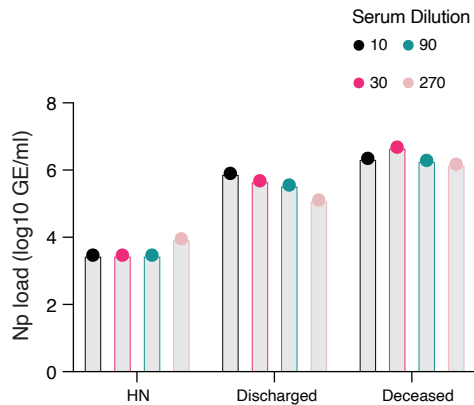

# Ext. Data Fig.5 :

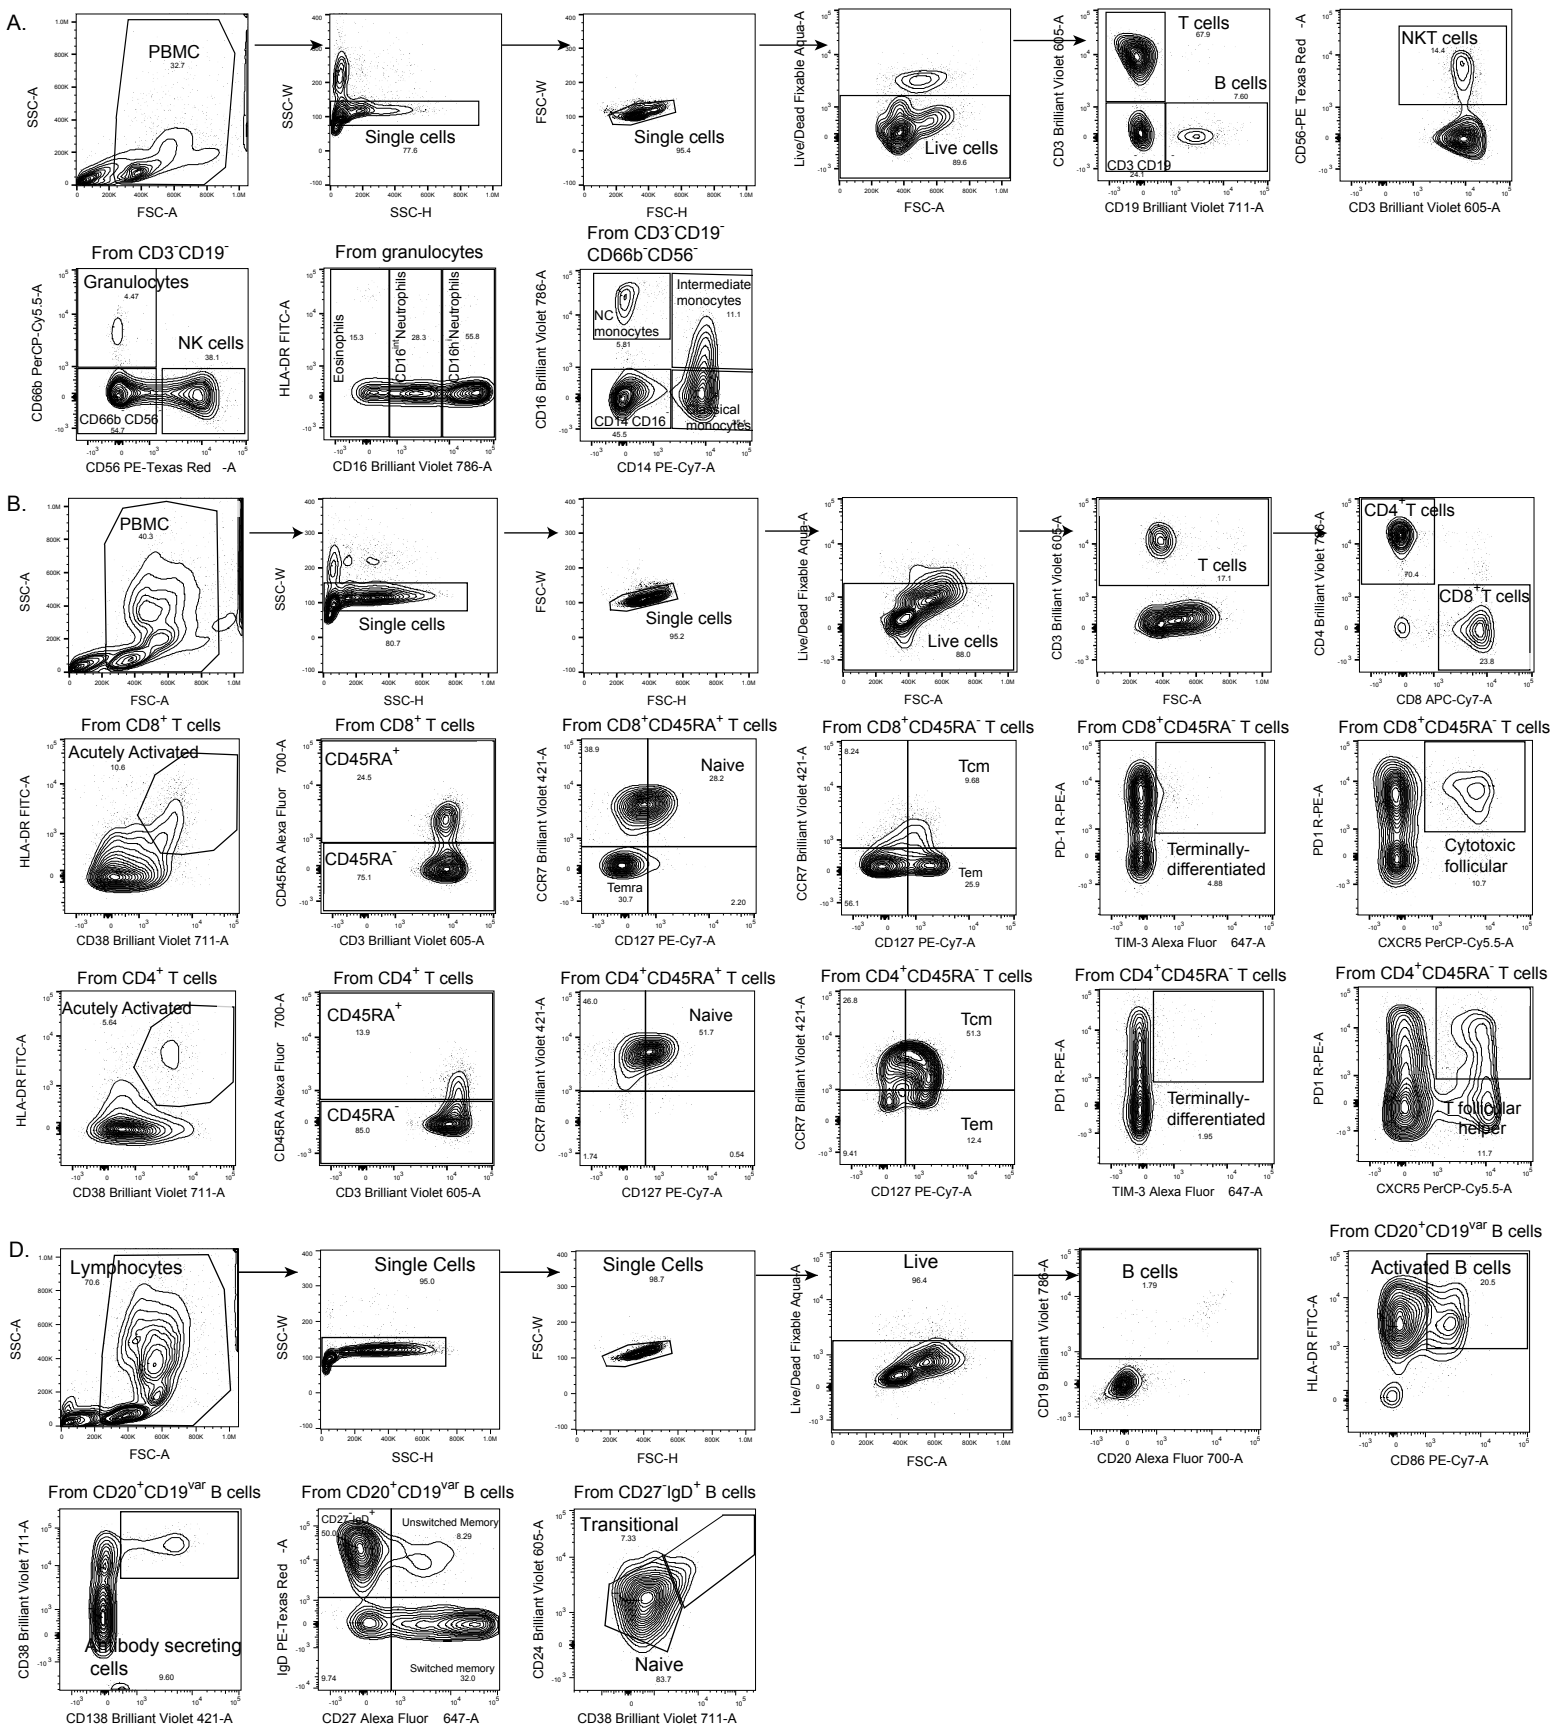

Supplement: Supplementary file [file media-1.pdf]
