# Supplementary material for: Kinetics of antibody responses dictate COVID-19 outcome
Source: bioRxiv or medRxiv preprint supplement (doi:10.1101/2020.12.18.20248331), 2020-12-22
Supplement: Supplementary file [file media-2.pdf]

## Extended Data Table 1 - IMPACT Cohort Total

|                    | Negative                   | Asymptomatic             | Mild                     | Moderate                   | Severe                    | Total                        |
|--------------------|----------------------------|--------------------------|--------------------------|----------------------------|---------------------------|------------------------------|
| <b>n</b>           | 108                        | 14                       | 16                       | 124                        | 55                        | 317                          |
| <b>Age (years)</b> | 37.92 ± 11.97              | 40.57 ± 10.83            | 27.81 ± 9.85             | 62.03 ± 17.62              | 63.15 ± 17.79             | 51.33 ± 19.92                |
| <b>Sex (M F)</b>   | 27 (25%)   81 (75%); n=108 | 2 (14%)   12 (86%); n=14 | 14 (88%)   2 (12%); n=16 | 58 (47%)   66 (53%); n=124 | 30 (55%)   25 (45%); n=55 | 131 (49%)   186 (51%); n=180 |
| <b>BMI</b>         | 26.98 ± 5.95; n=114        | --                       | --                       | 30.2 ± 8.21; n=114         | 32.25 ± 8.8; n=50         | 29.3 ± 7.76; n=164           |

## Extended Data Table 2 - Hospitalized IMPACT Patients

|                              | High Neutralizers       | Deceased                 | Discharged                 | Total                      |
|------------------------------|-------------------------|--------------------------|----------------------------|----------------------------|
| <b>n</b>                     | 14                      | 18                       | 150                        | 182                        |
| <b>Age (years)</b>           | 56.29 ± 12.3            | 74.06 ± 19.46            | 61.75 ± 17.49              | 62.56 ± 17.75              |
| <b>Sex (M F)</b>             | 8 (57%)   6 (43%); n=14 | 10 (56%)   8 (44%); n=18 | 70 (47%)   78 (53%); n=148 | 88 (49%)   92 (51%); n=180 |
| <b>BMI</b>                   | 33.89 ± 5.66; n=13      | 30.37 ± 10.57; n=18      | 30.58 ± 8.36; n=137        | 30.82 ± 8.42; n=168        |
| <b>COVID Risk Factors</b>    |                         |                          |                            |                            |
| <b>None</b>                  | 5 (36%)                 | 3 (17%)                  | 33 (22%)                   | 41 (23%); n=182            |
| <b>Cancer (&lt;1 year)</b>   | 0 (0%)                  | 2 (11%)                  | 12 (8%)                    | 14 (8%); n=182             |
| <b>Chronic Heart Disease</b> | 3 (21%)                 | 5 (28%)                  | 41 (27%)                   | 49 (27%); n=182            |
| <b>Hypertension</b>          | 6 (43%)                 | 10 (56%)                 | 75 (50%)                   | 91 (50%); n=182            |
| <b>Chronic Lung Disease</b>  | 3 (21%)                 | 3 (17%)                  | 37 (25%)                   | 43 (24%); n=182            |
| <b>Immunosuppression</b>     | 0 (0%)                  | 1 (6%)                   | 14 (9%)                    | 15 (8%); n=182             |

## Extended Data Table 3 - Mild COVID-19 Cohort

| Age   | n  | PCR+       | Spike-ECD (OD450)  | RBD (OD450)        | Hospitalized |
|-------|----|------------|--------------------|--------------------|--------------|
| 20-29 | 13 | 7/13 (54%) | 0.90 (0.77 - 1.26) | 1.11 (0.08-2.42)   | 0/13         |
| >30   | 3  | 1/3 (33%)  | 1.00 (0.08 - 2.42) | 1.01 (0.54 - 1.81) | 0/3          |
